# Supplementary material for: Widespread parainflammation in human cancer
Source: PubMed Central journal article supplement (PMC4937599; doi:10.1186/s13059-016-0995-z), 2016-07-08
Supplement: 13059_2016_995_MOESM3_ESM.pdf [file 13059_2016_995_MOESM3_ESM.pdf]

## Supplementary Figure 1: qPCR of PI genes in organoids

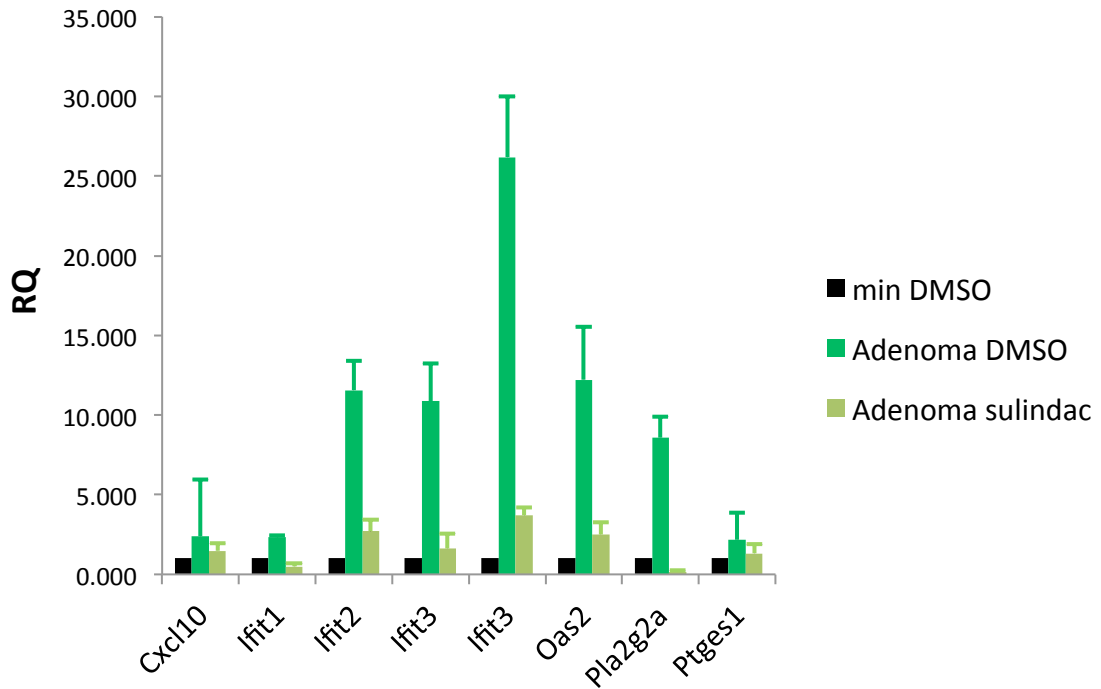

**Figure S1. qPCR of PI genes in organoids.** Organoids were generated from normal intestinal mucosa (min) or adenoma tissue (adenoma) of APC<sup>min/+</sup> mice. The organoids were treated with sulindac 500uM or DMSO for 48h. mRNA levels of PI genes were measured by qPCR.

## Supplementary Figure 2: Expression of PI genes in cell lines.

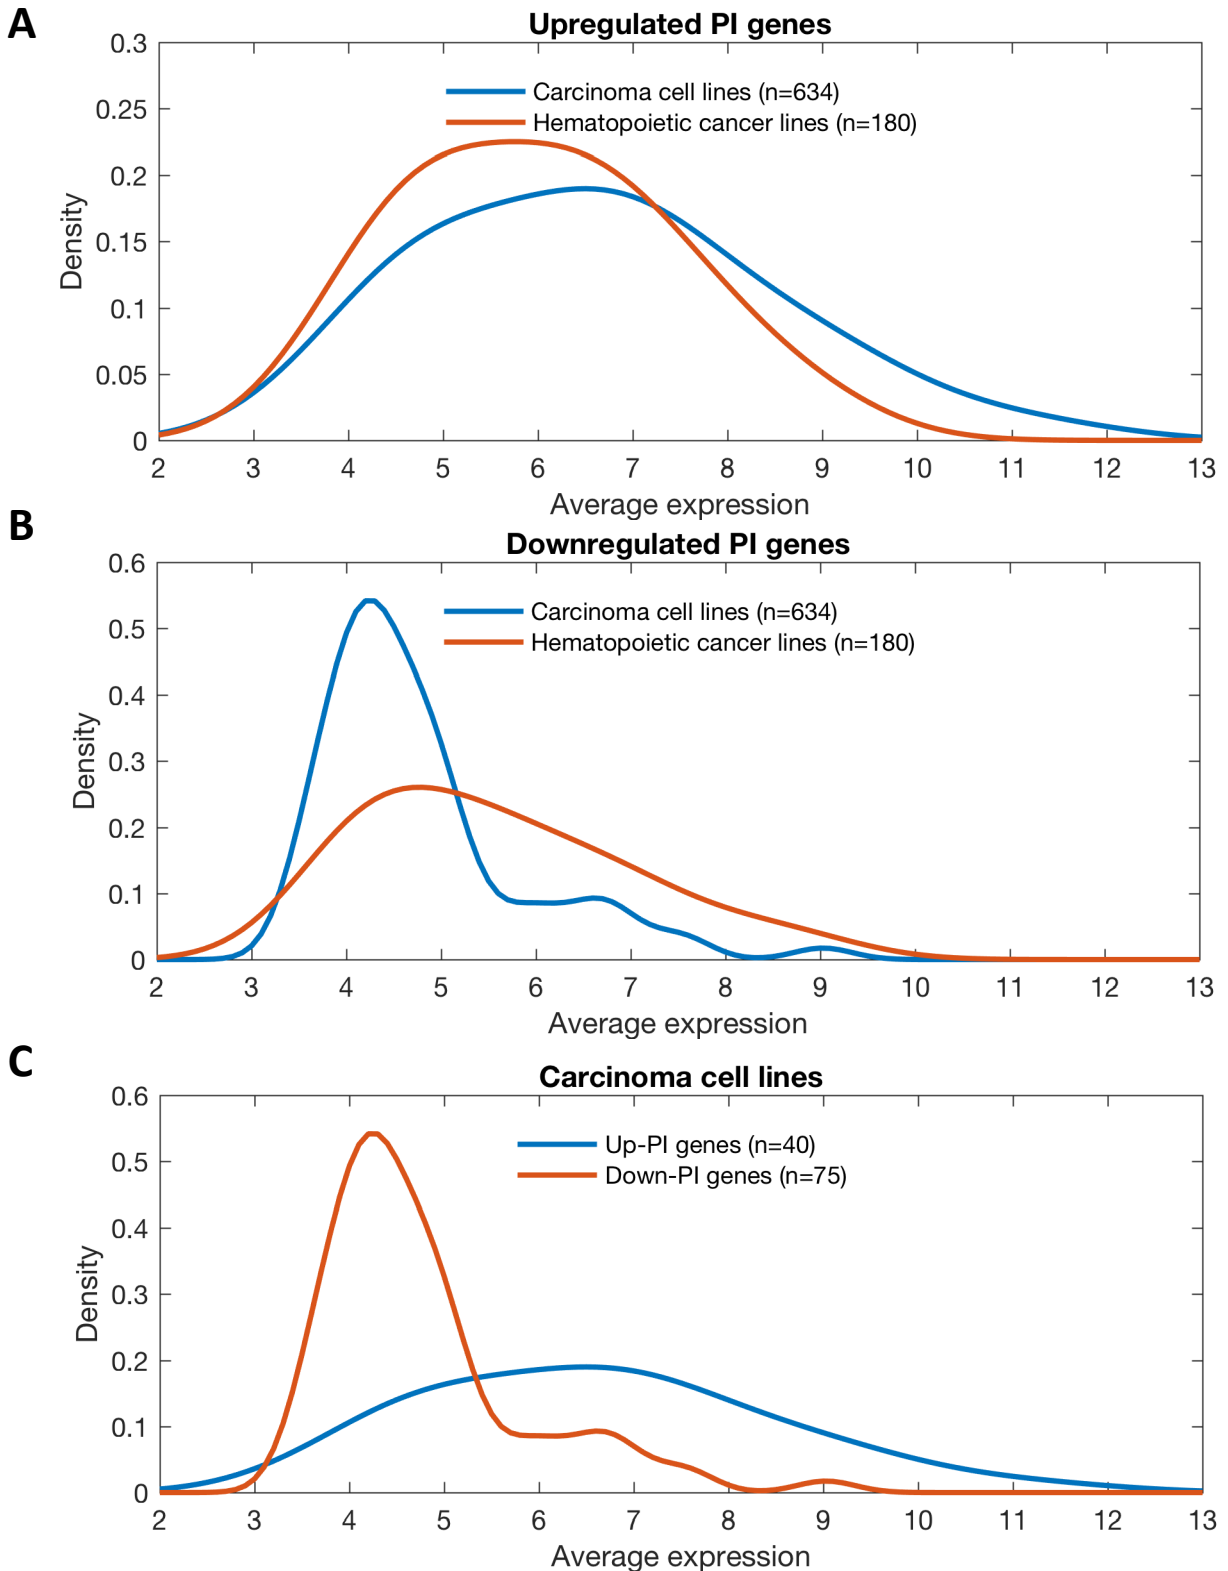

**Figure S2. Expression of PI genes in cell lines. A)** Distribution of the average expression levels (log<sub>2</sub> RMA) of the 40 upregulated PI genes in carcinoma cell lines compared to hematopoietic cell lines using the CCLE data. PI genes are expressed in carcinomas more than in leukemias. **B)** Same, using the 75 downregulated PI genes. **C)** Comparison of the up and downregulated PI genes. The majority of the downregulated PI genes are not expressed in carcinoma cell lines.

### Supplementary Figure 3: Correlation between the PI scores derived from up and downregulated genes.

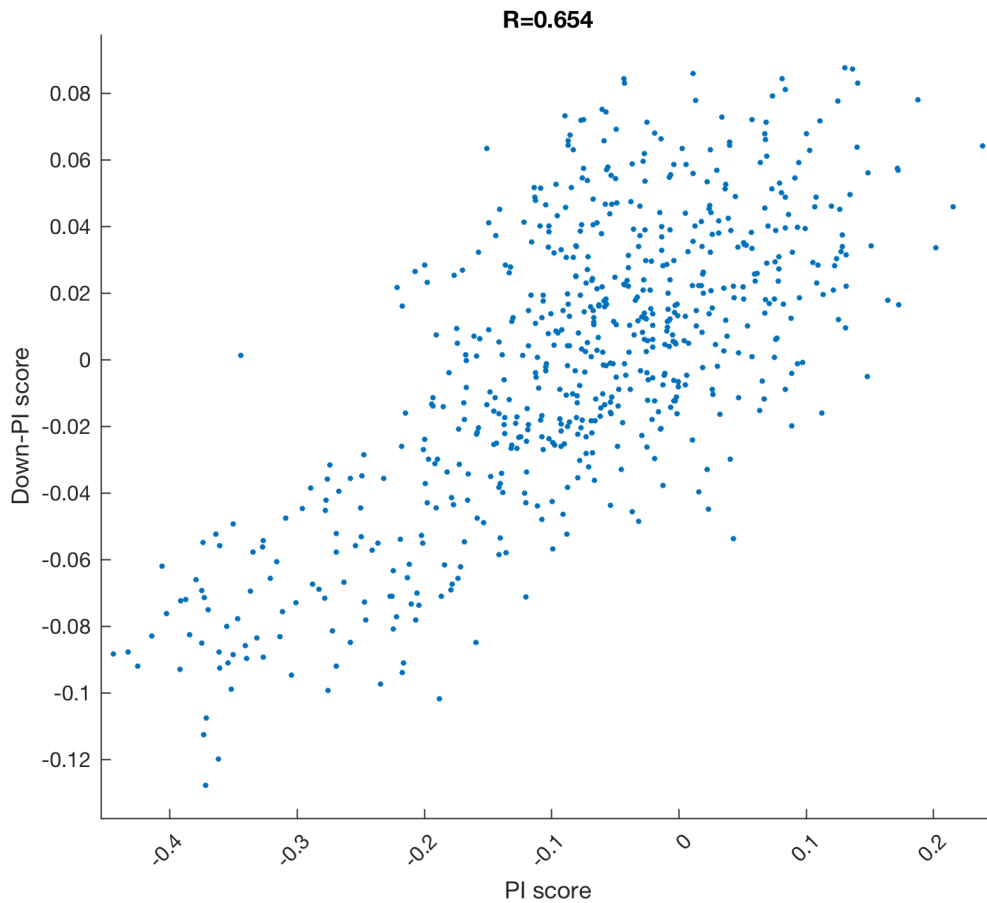

**Figure S3. Correlation between the PI scores derived from up and downregulated genes.** Scatter plot of ssGSEA PI scores (shifted such that PI+ is  $> 0$ ) vs. ssGSEA scores derived from the 75 downregulated PI genes in 634 carcinoma cell lines. Spearman correlation is presented.

# Supplementary Figure 4: Adjusting TCGA expression levels to immune infiltrations

## A CD45 is highly correlated with ESTIMATE immune score

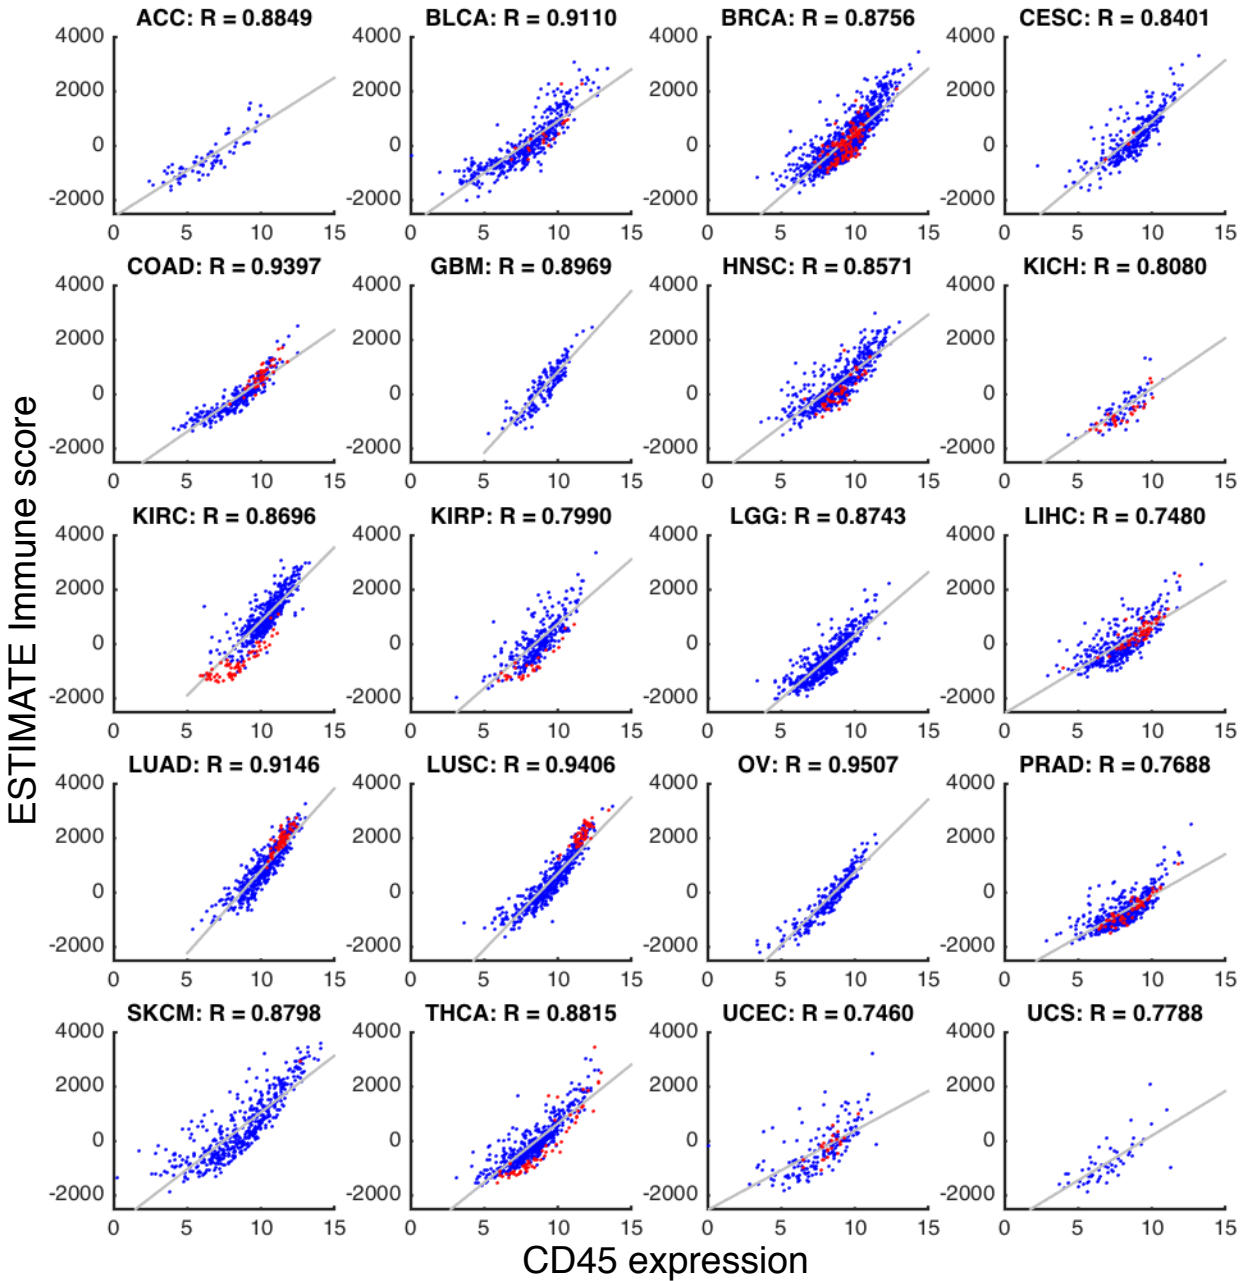

## B Learning normal association of expression with immune estimates

| TCGA cancer type | GTEx Tissue         | # of GTEx samples |
|------------------|---------------------|-------------------|
| ACC              | Adrenal Gland       | 52                |
| BLCA             | Bladder             | 11                |
| BRCA             | Breast              | 66                |
| <b>CESC</b>      | <b>Cervix Uteri</b> | <b>9</b>          |
| COAD             | Colon               | 74                |
| GBM              | Brain               | 357               |
| HNSC             | Esophagus           | 227               |
| KICH             | Kidney              | 8                 |
| KIRC             | Kidney              | 8                 |
| KIRP             | Kidney              | 8                 |
| LGG              | Brain               | 357               |
| LIHC             | Heart               | 133               |
| LUAD             | Lung                | 133               |
| LUSC             | Lung                | 133               |
| OV               | Ovary               | 35                |
| PAAD             | Pancreas            | 65                |
| PRAD             | Prostate            | 42                |
| <b>SKCM</b>      | <b>Skin</b>         | <b>322</b>        |
| <b>THCA</b>      | <b>Thyroid</b>      | <b>120</b>        |
| UCEC             | Uterus              | 36                |
| UCS              | Uterus              | 36                |

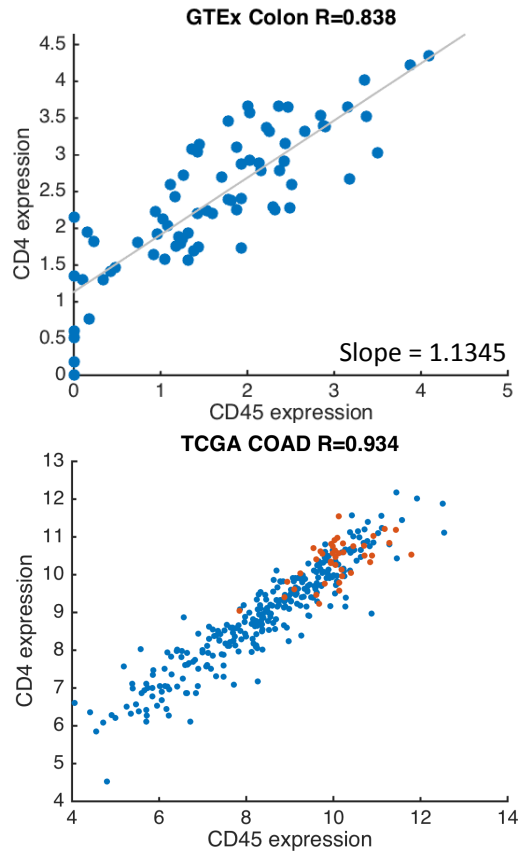

## C Adjusting TCGA expression levels using the learned slope

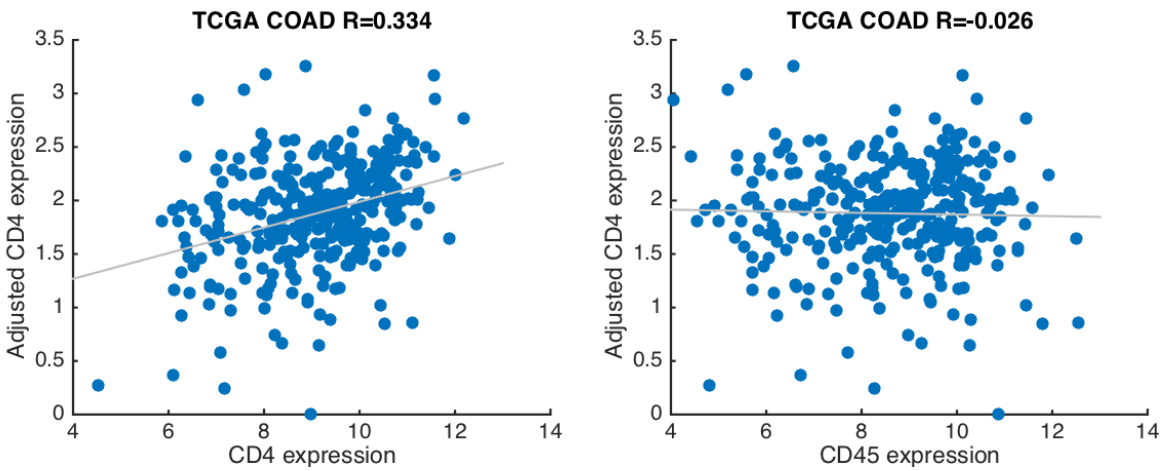

**Figure S4. Adjusting TCGA expression levels to immune infiltrations. A.** Scatter plots of CD45 (PTPRC) expression against the ESTIMATE immune score in each of the cancer types. Tumor samples are in blue, adjacent normal are in red. **B.** To adjust the TCGA samples we obtained expression data for normal samples from GTEx. The table shows the GTEx tissue and the number of samples that were used to learn the slopes in 21 cancer types. 3 cancer types were later omitted from further analyses due to high correlation with CD45 after adjustment (see figure S3). The left panel shows an example for the gene CD4 in colon. **C.** Using the slope learned in colon for CD4 we fit the expression levels of colon adenocarcinoma (COAD) TCGA samples. The adjusted expression is then shifted to 0. After adjustment there is no correlation with CD45 (right).

## Supplementary Figure 5: Correlation of the PI score with CD45 expression

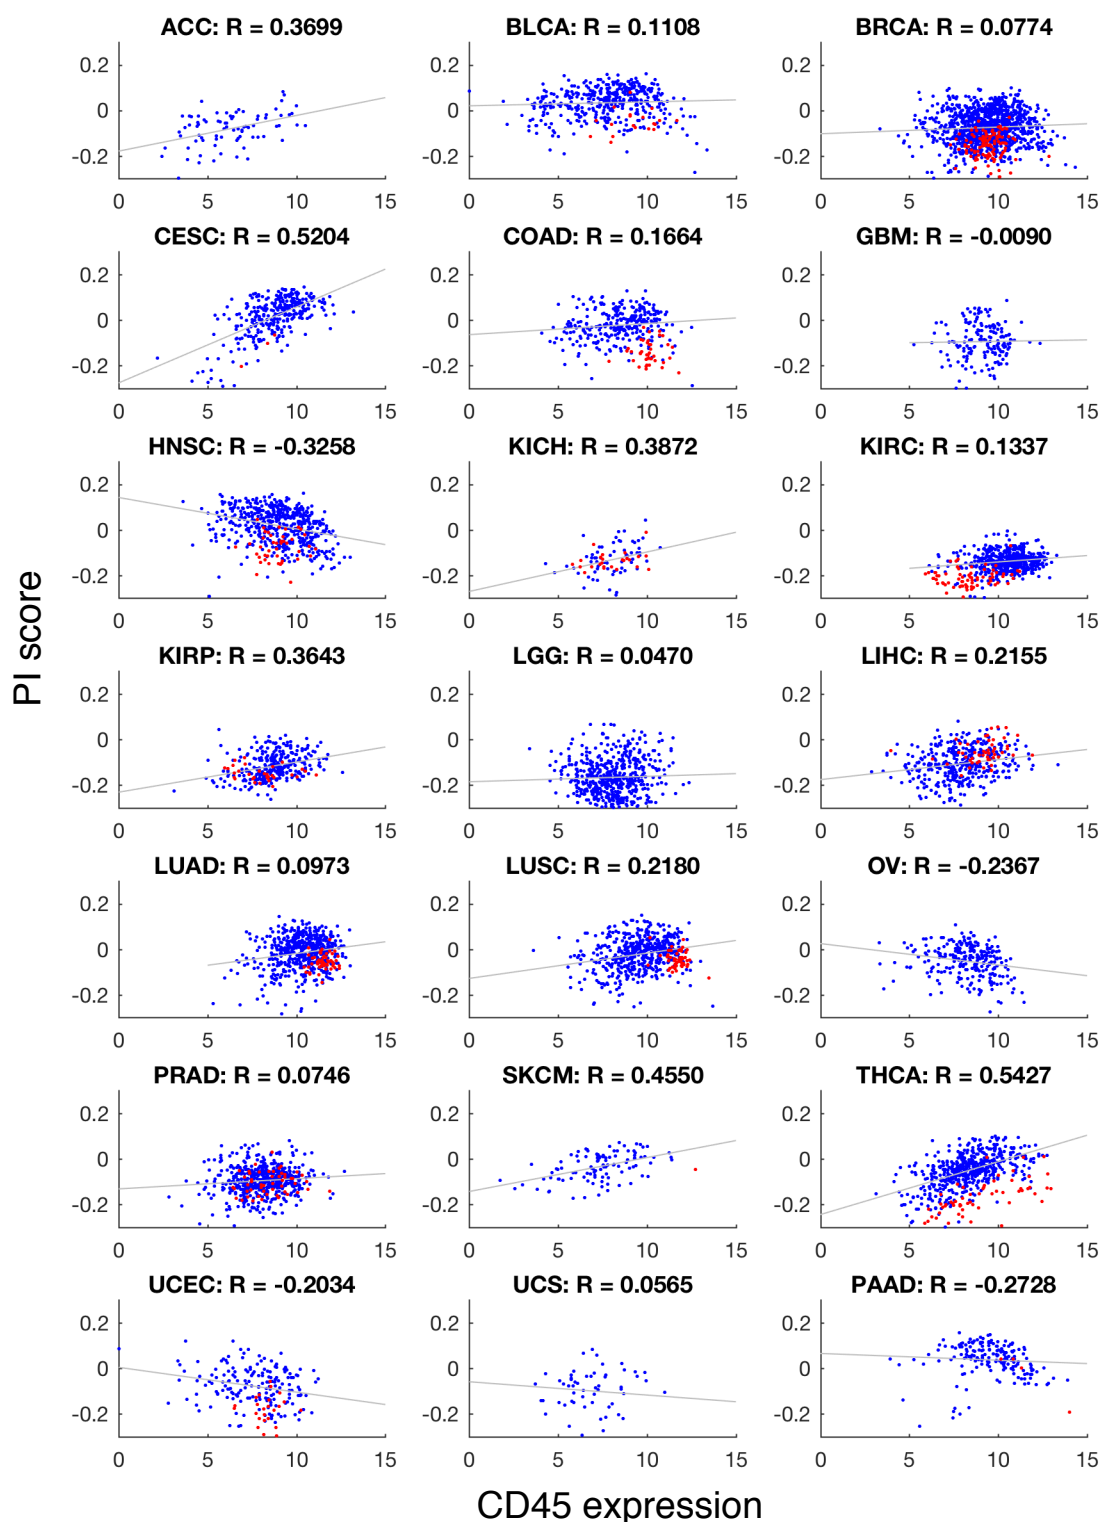

**Figure S5. Correlation of the PI score with CD45 expression.** PI scores (y-axis) vs. CD45 expression in 21 cancer types. Tumor samples are in blue, adjacent normal are in red. R is the spearman coefficient. In 3 cancer types the correlation of CD45 with the PI score remained high ( $|R| > 0.4$ ) even after adjustment: CESC, THCA and SKCM. This failure in adjustment is possibly due to bad fitting with GTEx tissue types. These cancer types were omitted from further analyses.

## Supplementary Figure 6: PI scores in TCGA cancer and adjacent normal samples

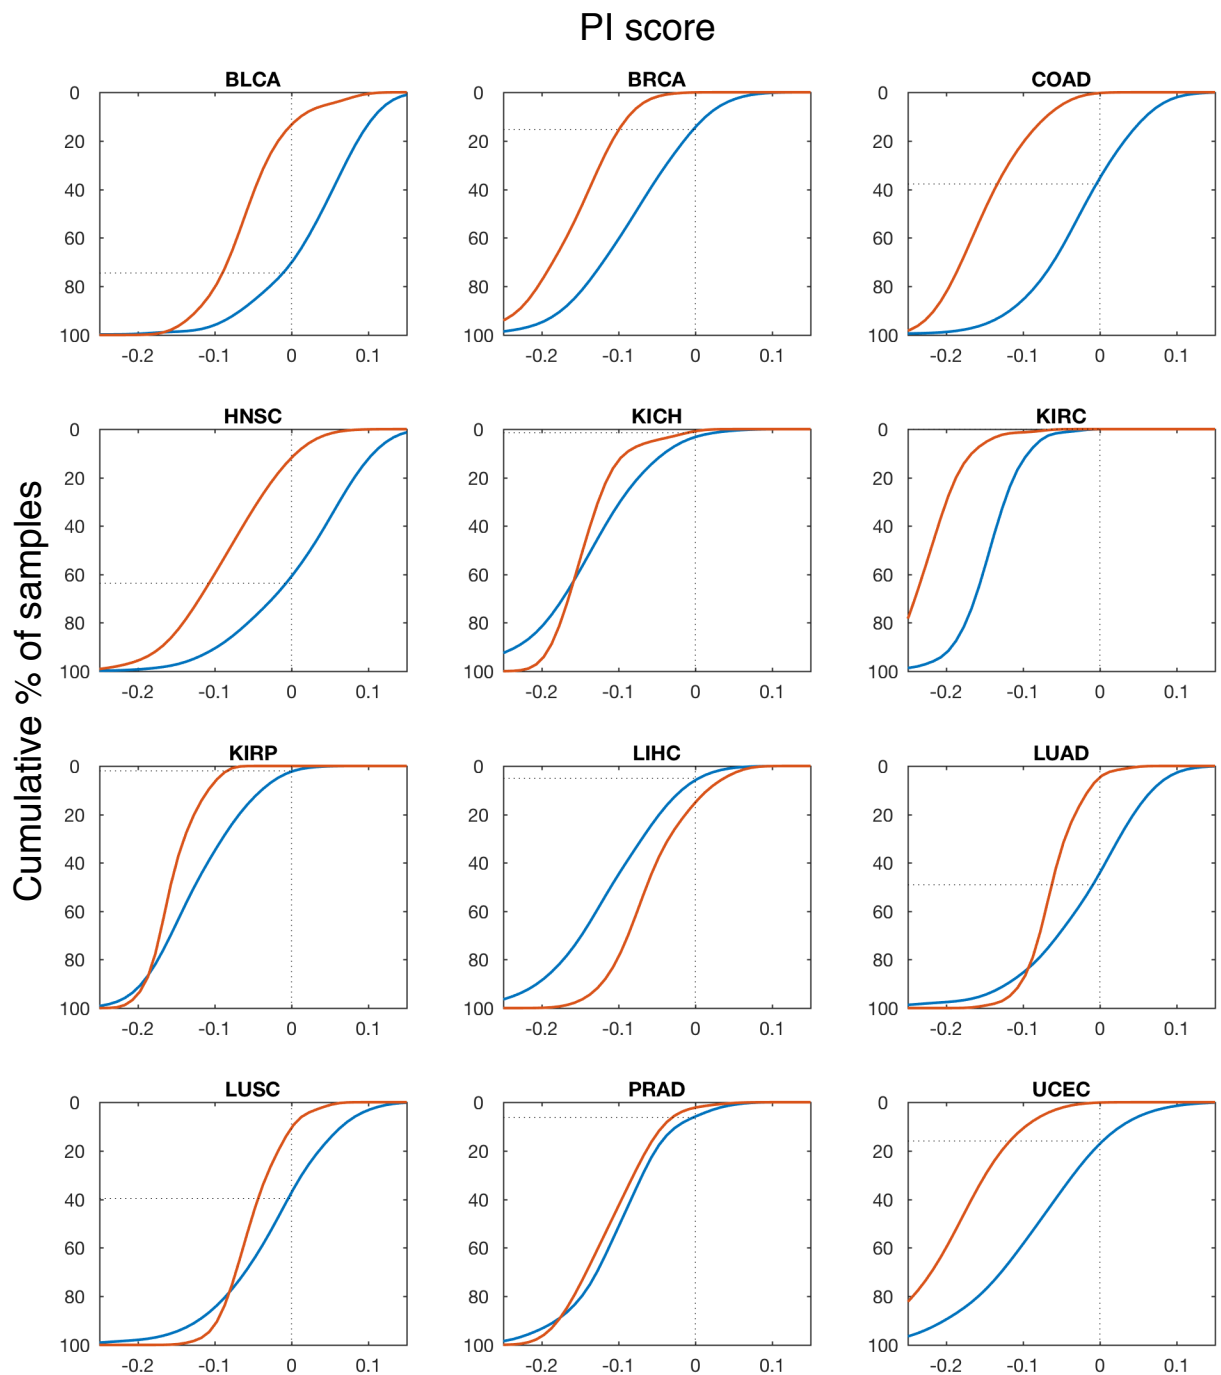

**Figure S6. PI scores in TCGA cancer and adjacent normal samples.** PI scores in tumors (blue) and adjacent normal (red) samples in 12 cancer types with at least 19 adjacent normal samples. The y-axis is the cumulative percent of samples over the score. Samples with positive score are PI+ (dashed line).

## Supplementary Figure 7: The PI score is correlated with the number of activated PI genes.

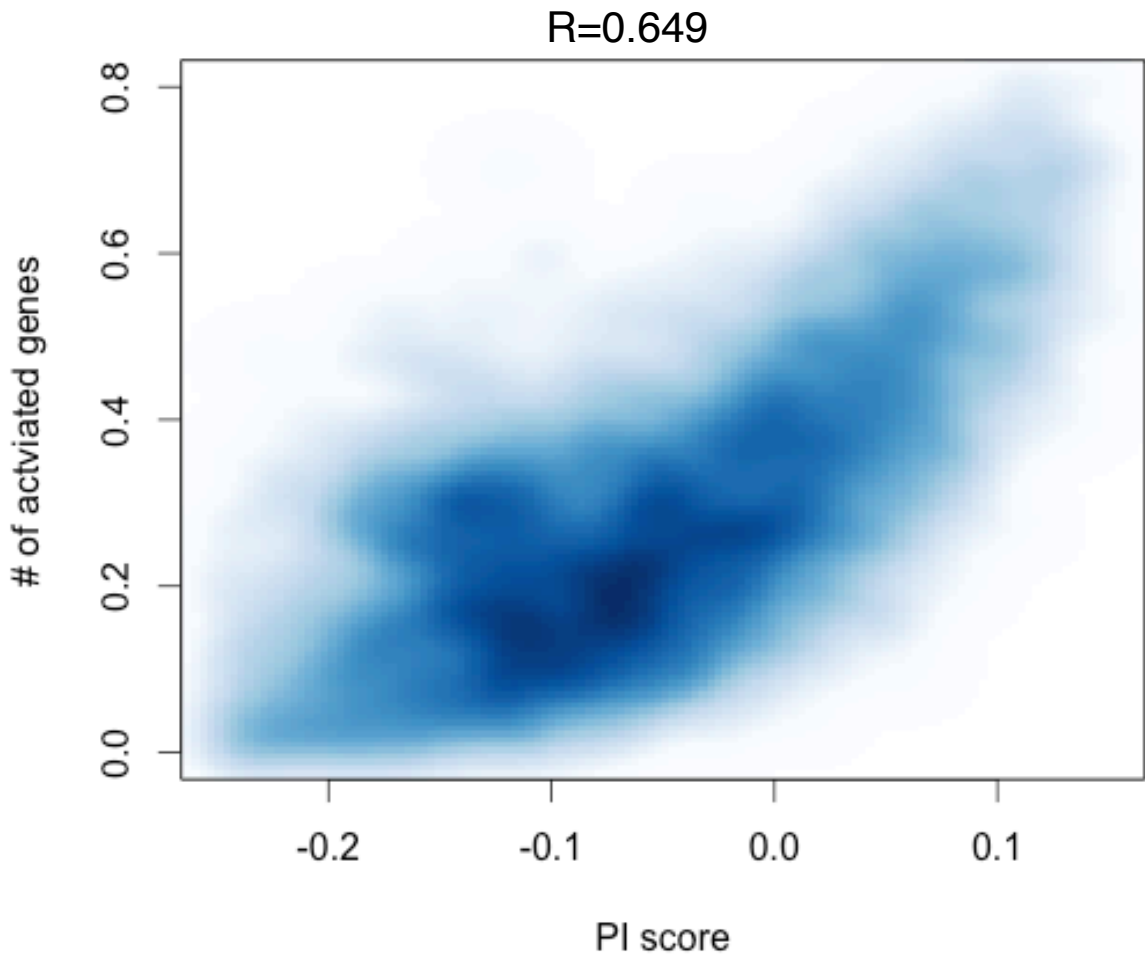

**Figure S7. The PI score is correlated with the number of activated PI genes.** The adjusted expression of the PI genes was normalized to 0 mean and 1 standard deviation. A gene is “activated” if the relative expression is  $> 0.5$ . Spearman coefficient is presented. Data points were smoothed using the ‘smoothScatter’ R package. The median number of ‘activated’ genes in PI+ samples is 17, compared to 8 in PI- samples. Moreover, only 3.7% of PI- samples have 17 or more ‘activated’ genes. This analysis shows that the PI score, which is calculated using a single sample’s gene expression profile, is also strongly associated with relative expression of the genes compared to all samples.



## Supplementary Figure 8: PI-associated genes response to Aspirin treatment

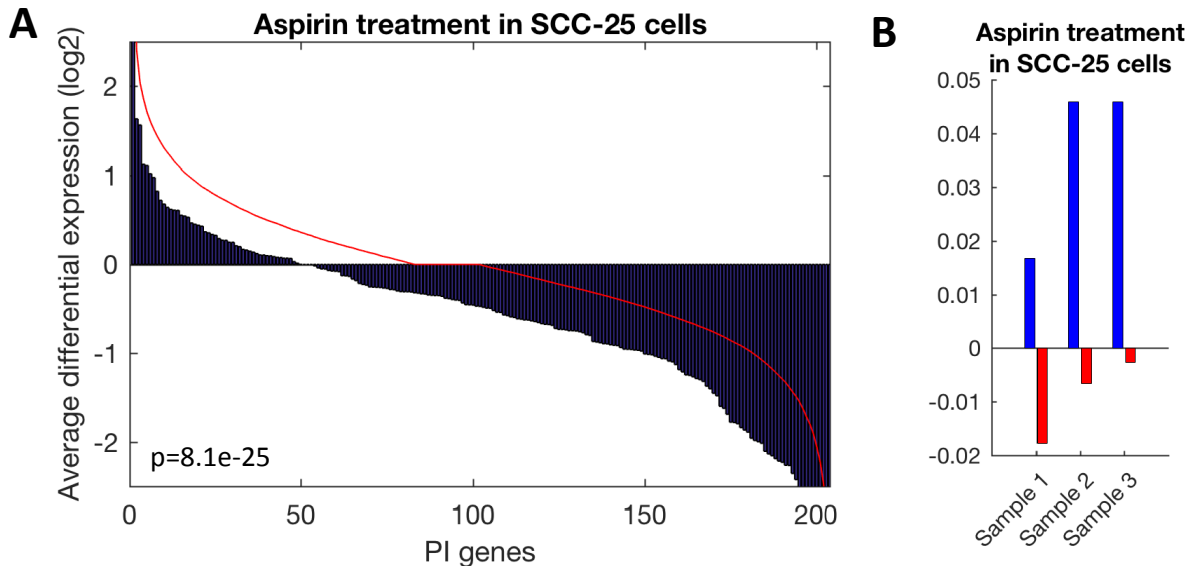

**Figure S8. PI-associated genes response to Aspirin treatment. A.** Average of the differential expression (in log<sub>2</sub> scale) of the three replicates each of control and aspirin treated SCC-25 cells for the 215 PI-associated genes. A kernel smoothed regression curve for all genes is presented as reference (in red). All the PI-associated genes are downregulated after treatment compared to expected by random. The p-value presented was calculated using Wilcoxon rank-sum test. **B.** The PI score (using the 215 PI-associated genes) calculated for each sample before and after treatment.

## Supplementary Table 1: Parainflammation gene signature

| Mouse gene symbol | Human gene symbol | Entrez ID | Entrez Gene Name                                                    | Type(s)                           |
|-------------------|-------------------|-----------|---------------------------------------------------------------------|-----------------------------------|
| Aim2              | AIM2              | 9447      | absent in melanoma 2                                                | other                             |
| Anxa1             | ANXA1             | 301       | annexin A1                                                          | enzyme                            |
| Blnk              | BLNK              | 29760     | B-cell linker                                                       | other                             |
| Bst2              | BST2              | 684       | bone marrow stromal cell antigen 2                                  | other                             |
| Ccnd1             | CCND1             | 595       | cyclin D1                                                           | transcription regulator           |
| Cd14              | CD14              | 929       | CD14 molecule                                                       | transmembrane receptor            |
| Cd276             | CD276             | 80381     | CD276 molecule                                                      | other                             |
| Cd44              | CD44              | 960       | CD44 molecule (Indian blood group)                                  | enzyme                            |
| Cxcl10            | CXCL10            | 3627      | chemokine (C-X-C motif) ligand 10                                   | cytokine                          |
| Cxcl9             | CXCL9             | 4283      | chemokine (C-X-C motif) ligand 9                                    | cytokine                          |
| Hmox1             | HMOX1             | 3162      | heme oxygenase 1                                                    | enzyme                            |
| Icam1             | ICAM1             | 3383      | intercellular adhesion molecule 1                                   | transmembrane receptor            |
| Ifit1             | IFIT1             | 3434      | interferon-induced protein with tetratricopeptide repeats 1         | other                             |
| Ifit2             | IFIT2             | 3433      | interferon-induced protein with tetratricopeptide repeats 2         | other                             |
| Ifit3             | IFIT3             | 3437      | interferon-induced protein with tetratricopeptide repeats 3         | other                             |
| Ifitm3            | IFITM3            | 10410     | interferon induced transmembrane protein 3                          | other                             |
| Il1rn             | IL1RN             | 3557      | interleukin 1 receptor antagonist                                   | cytokine                          |
| Il33              | IL33              | 90865     | interleukin 33                                                      | cytokine                          |
| Isg15             | ISG15             | 9636      | ISG15 ubiquitin-like modifier                                       | other                             |
| Itga2             | ITGA2             | 3673      | integrin, alpha 2 (CD49B, alpha 2 subunit of VLA-2 receptor)        | transmembrane receptor            |
| Lgmn              | LGMN              | 5641      | legumain                                                            | peptidase                         |
| Mmp7              | MMP7              | 4316      | matrix metalloproteinase 7                                          | peptidase                         |
| Mx1               | MX1               | 4599      | MX dynamin-like GTPase 1                                            | enzyme                            |
| Mx2               | MX2               | 4600      | MX dynamin-like GTPase 2                                            | enzyme                            |
| Nox1              | NOX1              | 27035     | NADPH oxidase 1                                                     | ion channel                       |
| Oas1g             | OAS1              | 4938      | 2'-5'-oligoadenylate synthetase 1, 40/46kDa                         | enzyme                            |
| Oas2              | OAS2              | 4939      | 2'-5'-oligoadenylate synthetase 2, 69/71kDa                         | enzyme                            |
| Oas3              | OAS3              | 4940      | 2'-5'-oligoadenylate synthetase 3, 100kDa                           | enzyme                            |
| Pla2g2a           | PLA2G2A           | 5320      | phospholipase A2, group IIA (platelets, synovial fluid)             | enzyme                            |
| Pla2g2d           | PLA2G2D           | 26279     | phospholipase A2, group IID                                         | enzyme                            |
| Plat              | PLAT              | 5327      | plasminogen activator, tissue                                       | peptidase                         |
| Plaur             | PLAUR             | 5329      | plasminogen activator, urokinase receptor                           | transmembrane receptor            |
| Pparg             | PPARG             | 5468      | peroxisome proliferator-activated receptor gamma                    | ligand-dependent nuclear receptor |
| Ptges             | PTGES             | 9536      | prostaglandin E synthase                                            | enzyme                            |
| Rel               | REL               | 5966      | v-rel avian reticuloendotheliosis viral oncogene homolog            | transcription regulator           |
| Retnlb            | RETNLB            | 84666     | resistin like beta                                                  | other                             |
| Scarb1            | SCARB1            | 949       | scavenger receptor class B, member 1                                | transporter                       |
| Tirap             | TIRAP             | 114609    | toll-interleukin 1 receptor (TIR) domain containing adaptor protein | other                             |
| Tlr2              | TLR2              | 7097      | toll-like receptor 2                                                | transmembrane receptor            |
| Tnfrsf12a         | TNFRSF12A         | 51330     | tumor necrosis factor receptor superfamily, member 12A              | transmembrane receptor            |

**Table S1. Parainflammation gene signature.** 40 inflammatory response genes that were upregulated in an RNA-seq analyses of two mouse models. The table presents also the human orthologs of the mouse PI genes.

## Supplementary Table 2: Down-regulated parainflammation gene

| Mouse gene symbol | Human gene symbol | Entrez ID | Entrez Gene Name                                                                      | Type(s)                           |
|-------------------|-------------------|-----------|---------------------------------------------------------------------------------------|-----------------------------------|
| Abcg1             | ABCG1             | 9619      | ATP binding cassette subfamily G member 1                                             | transporter                       |
| Ace               | ACE               | 1636      | angiotensin I converting enzyme                                                       | peptidase                         |
| Alox5ap           | ALOX5AP           | 241       | arachidonate 5-lipoxygenase-activating protein                                        | other                             |
| Apoa1             | APOA1             | 335       | apolipoprotein A-I                                                                    | transporter                       |
| Atf3              | ATF3              | 467       | activating transcription factor 3                                                     | transcription regulator           |
| C1qa              | C1QA              | 712       | complement component 1, q subcomponent, A chain                                       | other                             |
| C1qb              | C1QB              | 713       | complement component 1, q subcomponent, B chain                                       | other                             |
| C1qc              | C1QC              | 714       | complement component 1, q subcomponent, C chain                                       | other                             |
| C1s               | C1S               | 716       | complement component 1, s subcomponent                                                | peptidase                         |
| Ccl24             | CCL24             | 6369      | chemokine (C-C motif) ligand 24                                                       | cytokine                          |
| Cd200             | CD200             | 4345      | CD200 molecule                                                                        | other                             |
| Cd200r1           | CD200R1           | 131450    | CD200 receptor 1                                                                      | other                             |
| Cd300lf           | CD300LF           | 146722    | CD300 molecule like family member f                                                   | other                             |
| Cd36              | CD36              | 948       | CD36 molecule                                                                         | transmembrane receptor            |
| Cd4               | CD4               | 920       | CD4 molecule                                                                          | transmembrane receptor            |
| Cd40lg            | CD40LG            | 959       | CD40 ligand                                                                           | cytokine                          |
| Cd5l              | CD5L              | 922       | CD5 molecule like                                                                     | transmembrane receptor            |
| Cd69              | CD69              | 969       | CD69 molecule                                                                         | transmembrane receptor            |
| Cd8a              | CD8A              | 925       | CD8a molecule                                                                         | other                             |
| Cish              | CISH              | 1154      | cytokine inducible SH2-containing protein                                             | other                             |
| Cd209a            | CLEC4M            | 10332     | C-type lectin domain family 4 member M                                                | other                             |
| Csf1r             | CSF1R             | 1436      | colony stimulating factor 1 receptor                                                  | kinase                            |
| Csf2              | CSF2              | 1437      | colony stimulating factor 2                                                           | cytokine                          |
| Cxcr6             | CXCR6             | 10663     | chemokine (C-X-C motif) receptor 6                                                    | G-protein coupled receptor        |
| Cybb              | CYBB              | 1536      | cytochrome b-245, beta polypeptide                                                    | enzyme                            |
| Ets1              | ETS1              | 2113      | v-ets avian erythroblastosis virus E26 oncogene homolog 1                             | transcription regulator           |
| Fasl              | FASLG             | 356       | Fas ligand                                                                            | cytokine                          |
| Fcer1g            | FCER1G            | 2207      | Fc fragment of IgE receptor Ig                                                        | transmembrane receptor            |
| Gbp1              | GBP1              | 2633      | guanylate binding protein 1, interferon-inducible                                     | enzyme                            |
| Hck               | HCK               | 3055      | HCK proto-oncogene, Src family tyrosine kinase                                        | kinase                            |
| Ido1              | IDO1              | 3620      | indoleamine 2,3-dioxygenase 1                                                         | enzyme                            |
| Il15              | IL15              | 3600      | interleukin 15                                                                        | cytokine                          |
| Il16              | IL16              | 3603      | interleukin 16                                                                        | cytokine                          |
| Il2rb             | IL2RB             | 3560      | interleukin 2 receptor subunit beta                                                   | transmembrane receptor            |
| Il2rg             | IL2RG             | 3561      | interleukin 2 receptor subunit gamma                                                  | transmembrane receptor            |
| Inpp5d            | INPP5D            | 3635      | inositol polyphosphate-5-phosphatase D                                                | phosphatase                       |
| Irf4              | IRF4              | 3662      | interferon regulatory factor 4                                                        | transcription regulator           |
| Itgam             | ITGAM             | 3684      | integrin subunit alpha M                                                              | transmembrane receptor            |
| Itgb2             | ITGB2             | 3689      | integrin subunit beta 2                                                               | transmembrane receptor            |
| Itgb7             | ITGB7             | 3695      | integrin subunit beta 7                                                               | transmembrane receptor            |
| Jun               | JUN               | 3725      | jun proto-oncogene                                                                    | transcription regulator           |
| Lum               | LUM               | 4060      | lumican                                                                               | other                             |
| Ly9               | LY9               | 4063      | lymphocyte antigen 9                                                                  | other                             |
| Lyz2              | LYZ               | 4069      | lysozyme                                                                              | enzyme                            |
| Mbl2              | MBL2              | 4153      | mannose-binding lectin (protein C) 2, soluble                                         | other                             |
| Ncf1              | NCF1              | 653361    | neutrophil cytosolic factor 1                                                         | enzyme                            |
| Nckap1l           | NCKAP1L           | 3071      | NCK associated protein 1 like                                                         | other                             |
| Nlrp6             | NLRP6             | 171389    | NLR family, pyrin domain containing 6                                                 | G-protein coupled receptor        |
| Nlrp9b            | NLRP9             | 338321    | NLR family, pyrin domain containing 9                                                 | other                             |
| Nr1h3             | NR1xH3            | 10062     | nuclear receptor subfamily 1 group H member 3                                         | ligand-dependent nuclear receptor |
| Nt5e              | NT5E              | 4907      | 5'-nucleotidase ecto                                                                  | phosphatase                       |
| P2rx7             | P2RX7             | 5027      | purinergic receptor P2X, ligand gated ion channel, 7                                  | ion channel                       |
| Pglyrp2           | PGLYRP2           | 114770    | peptidoglycan recognition protein 2                                                   | transmembrane receptor            |
| Pik3cg            | PIK3CG            | 5294      | phosphatidylinositol-4,5-bisphosphate 3-kinase catalytic subunit gamma                | kinase                            |
| Prf1              | PRF1              | 5551      | perforin 1 (pore forming protein)                                                     | other                             |
| Pros1             | PROS1             | 5627      | protein S (alpha)                                                                     | other                             |
| Ptgs1             | PTGS1             | 5742      | prostaglandin-endoperoxide synthase 1 (prostaglandin G/H synthase and cyclooxygenase) | enzyme                            |
| Ptprc             | PTPRC             | 5788      | protein tyrosine phosphatase, receptor type C                                         | phosphatase                       |
| Reg3b             | REG3A             | 5068      | regenerating family member 3 alpha                                                    | enzyme                            |
| Rgs1              | RGS1              | 5996      | regulator of G-protein signaling 1                                                    | other                             |
| Selplg            | SELPLG            | 6404      | selectin P ligand                                                                     | other                             |
| Siglec5           | SIGLEC8           | 27181     | sialic acid binding Ig-like lectin 8                                                  | transmembrane receptor            |
| Slamf7            | SLAMF7            | 57823     | SLAM family member 7                                                                  | other                             |
| SpiB              | SPIB              | 6689      | Spi-B transcription factor (Spi-1/PU.1 related)                                       | transcription regulator           |
| Stat4             | STAT4             | 6775      | signal transducer and activator of transcription 4                                    | transcription regulator           |
| Tbx21             | TBX21             | 30009     | T-box 21                                                                              | transcription regulator           |
| Tnfaip8l2         | TNFAIP8L2         | 79626     | TNF alpha induced protein 8 like 2                                                    | other                             |
| Traf1             | TRAF1             | 7185      | TNF receptor associated factor 1                                                      | other                             |
| Trat1             | TRAT1             | 50852     | T cell receptor associated transmembrane adaptor 1                                    | kinase                            |
| Trim38            | TRIM38            | 10475     | tripartite motif containing 38                                                        | other                             |
| Tyrobp            | TYROBP            | 7305      | TYRO protein tyrosine kinase binding protein                                          | transmembrane receptor            |
| Vav1              | VAV1              | 7409      | vav guanine nucleotide exchange factor 1                                              | transcription regulator           |
| Vegfc             | VEGFC             | 7424      | vascular endothelial growth factor C                                                  | growth factor                     |
| Was               | WAS               | 7454      | Wiskott-Aldrich syndrome                                                              | other                             |
| Xcl1              | XCL1              | 6375      | chemokine (C motif) ligand 1                                                          | cytokine                          |

**Table S2. Down-regulated parainflammation genes.** 75 inflammatory response genes that were downregulated in an RNA-seq analyses of two mouse models. The table presents also 11 the human orthologs of the mouse genes.

### Supplementary Table 3: List of samples acquired from TCGA

| TCGA abbreviation | Cancer type                                                      | Cancer # | Adjacent normal # |
|-------------------|------------------------------------------------------------------|----------|-------------------|
| ACC               | Adrenocortical carcinoma                                         | 79       | 0                 |
| BLCA              | Bladder Urothelial Carcinoma                                     | 407      | 19                |
| BRCA              | Breast invasive carcinoma                                        | 1091     | 111               |
| COAD              | Colon adenocarcinoma                                             | 286      | 41                |
| GBM               | Glioblastoma multiforme                                          | 166      | 0                 |
| HNSC              | Head and Neck squamous cell carcinoma                            | 514      | 43                |
| KICH              | Kidney Chromophobe                                               | 66       | 25                |
| KIRC              | Kidney renal clear cell carcinoma                                | 534      | 72                |
| KIRP              | Kidney renal papillary cell carcinoma                            | 291      | 32                |
| LGG               | Brain Lower Grade Glioma                                         | 530      | 0                 |
| LIHC              | Liver hepatocellular carcinoma                                   | 373      | 50                |
| LUAD              | Lung adenocarcinoma                                              | 513      | 58                |
| LUSC              | Lung squamous cell carcinoma                                     | 501      | 51                |
| OV                | Ovarian serous cystadenocarcinoma                                | 265      | 0                 |
| PAAD              | Pancreatic adenocarcinoma                                        | 178      | 4                 |
| PRAD              | Prostate adenocarcinoma                                          | 497      | 52                |
| UCEC              | Uterine Corpus Endometrial Carcinoma                             | 175      | 24                |
| UCS               | Uterine Carcinosarcoma                                           | 57       | 0                 |
| CESC              | Cervical squamous cell carcinoma and endocervical adenocarcinoma | 304      | 3                 |
| SKCM              | Skin Cutaneous Melanoma                                          | 106      | 1                 |
| THCA              | Thyroid carcinoma                                                | 501      | 59                |

**Table S3. List of samples acquired from TCGA.** Number of cancer and adjacent normal samples in 21 TCGA cancer types that were used in this study. Only primary tumor samples were analyzed. The 3 cancer types on the bottom were omitted from the analyses due to high correlation with CD45 after adjustment of expression to immune infiltrations (see supplementary figure 2). The data was downloaded from the TCGA portal on January 15, 2015.

## Supplementary Table 4:

### Transcription factors binding enrichment analysis of PI genes

| Factor       | Total Genes with Factor | Extended PI genes<br>(207 genes) | Q-value<br>(Hypergeometric Test; Benjamini-Hochberg) |
|--------------|-------------------------|----------------------------------|------------------------------------------------------|
| Stat2lfna6h  | 288                     | 49                               | 5.09E-45                                             |
| Irf1lfna30   | 171                     | 40                               | 7.05E-43                                             |
| Stat1lfna6h  | 319                     | 45                               | 8.56E-38                                             |
| Stat1lfna30  | 286                     | 41                               | 8.91E-35                                             |
| Stat2lfna30  | 742                     | 46                               | 1.14E-22                                             |
| Stat3Tam112h | 1620                    | 64                               | 3.31E-21                                             |
| Stat3Etoh01c | 1666                    | 62                               | 3.48E-19                                             |
| Stat3Etoh01b | 1649                    | 61                               | 9.14E-19                                             |
| CfosTam14h   | 1265                    | 52                               | 8.36E-18                                             |
| Prdm1        | 282                     | 26                               | 2.44E-17                                             |
| Pol2         | 13720                   | 190                              | 2.85E-16                                             |
| Stat3Tam     | 2217                    | 67                               | 2.85E-16                                             |
| CfosTam112h  | 1621                    | 54                               | 1.22E-14                                             |
| Stat3        | 1170                    | 44                               | 1.04E-13                                             |
| CfosEtoh01   | 1478                    | 47                               | 5.86E-12                                             |
| CfosTam      | 1769                    | 49                               | 2.74E-10                                             |
| Cebpb        | 5485                    | 98                               | 1.44E-09                                             |
| Taf1         | 11637                   | 160                              | 5.68E-09                                             |
| Stat1lfng30  | 2801                    | 61                               | 1.30E-08                                             |
| Tbp          | 10552                   | 149                              | 1.30E-08                                             |
| Batf         | 854                     | 29                               | 3.23E-08                                             |
| Irf4         | 1671                    | 43                               | 3.81E-08                                             |
| Stat3Etoh01  | 928                     | 30                               | 5.14E-08                                             |
| Smc3         | 4062                    | 76                               | 5.96E-08                                             |
| Irf1lfna6h   | 3027                    | 62                               | 8.11E-08                                             |
| Stat1lfng6h  | 610                     | 23                               | 1.34E-07                                             |
| P300         | 7444                    | 112                              | 8.21E-07                                             |
| Pol2Etoh01   | 8593                    | 121                              | 7.73E-06                                             |
| Baf155       | 1364                    | 33                               | 7.97E-06                                             |
| Ap2alpha     | 3106                    | 57                               | 1.29E-05                                             |
| Pol2Tam      | 8580                    | 120                              | 1.29E-05                                             |
| Rad21        | 5777                    | 88                               | 3.34E-05                                             |
| Ebf1         | 3943                    | 66                               | 4.02E-05                                             |
| Ap2gamma     | 4170                    | 67                               | 1.33E-04                                             |
| NfkbTnfa     | 6987                    | 99                               | 1.47E-04                                             |
| Ikzf1        | 193                     | 9                                | 1.70E-04                                             |
| Max          | 11417                   | 144                              | 1.70E-04                                             |
| Yy1          | 10448                   | 134                              | 2.32E-04                                             |
| Pu1          | 4392                    | 68                               | 3.37E-04                                             |
| Cjun         | 2138                    | 39                               | 5.67E-04                                             |
| Fosl2        | 3159                    | 52                               | 6.18E-04                                             |
| CmycTam14h   | 2561                    | 44                               | 8.03E-04                                             |
| Bcl11a       | 761                     | 17                               | 3.94E-03                                             |
| Irf1lfng30   | 4194                    | 61                               | 4.50E-03                                             |
| eGFP-Fos     | 402                     | 10                               | 1.30E-02                                             |
| Cfos         | 3726                    | 53                               | 1.59E-02                                             |
| Znf217       | 208                     | 6                                | 2.41E-02                                             |
| Gr           | 3749                    | 52                               | 2.81E-02                                             |
| CmycEtoh01   | 5767                    | 74                               | 3.62E-02                                             |
| Tcf712       | 6234                    | 79                               | 3.66E-02                                             |
| Tcf12        | 5918                    | 75                               | 4.48E-02                                             |
| Sin3a        | 10934                   | 127                              | 4.93E-02                                             |
| Pol2b        | 5310                    | 68                               | 4.94E-02                                             |

**Table S4. Transcription factors binding enrichment analysis of PI genes.** The table presents the transcription factors (TFs) with significant enriched binding in promoters of genes associated with the PI score ( $R > 0.5$  in the CCLE dataset). The analysis was performed using the ENCODE ChIP-Seq Significance Tool (<http://encodegt.simple-encode.org/>). Only 207 of the 215 PI-associated genes were matched with a symbol in the analysis.

## Supplementary Table 5: Immune gene signatures

| Gene set                           | Gene symbols                                                                                               | Source    |
|------------------------------------|------------------------------------------------------------------------------------------------------------|-----------|
| <b>NF-kappaB Pathway</b>           | ACP2,ACPP,CCNB1,DLGAP1,EGR3,ENPP2,FBXW11,GABRG2,GDF15,H1FX,HMGCR,ITPKA,IVD,KIAA0196,RAB8A,RNF2,SPINT1,TPX2 | Jin*      |
| <b>TNF Signaling</b>               | ADAM17,BAG4,CASP8,CYLD,FADD,OTUD7B,RIPK1,TNF,TNFRSF1A,TRADD,TRAF2,USP2,USP21,USP4                          | Reactome  |
| <b>Type I Interferon Response</b>  | MX1,TNFSF10,RSAD2,IFIT1,IFIT3,IFIT2,IRF7,DDX4,MX2,ISG20                                                    | Rooney*** |
| <b>Type II Interferon Response</b> | GPR146,SELP,AHR                                                                                            | Rooney*** |
| <b>B cells</b>                     | CD79B,BTLA,FCRL3,BANK1,CD79A,BLK,RALGPS2,FCRL1,HVCN1,BA<br>CH2                                             | Rooney*** |
| <b>CD4+ Regulatory T cells</b>     | FOXP3,C15orf53,IL5,CTLA4,IL32,GPR15,IL4                                                                    | Rooney*** |
| <b>CD8+ T cells</b>                | CD8A                                                                                                       | Rooney*** |
| <b>Macrophages</b>                 | FUCA1,MMP9,LGMN,HS3ST2,TM4SF19,CLEC5A,GPNMB,C11orf45,<br>CD68,CYBB                                         | Rooney*** |
| <b>Neutrophils</b>                 | KDM6B,HSD17B11,EVI2B,MNDA,MEGF9,SELL,NLRP12,PADI4,TRAN<br>K1,VNN3                                          | Rooney*** |
| <b>NK cells</b>                    | KLRF1,KLRC1                                                                                                | Rooney*** |
| <b>pDCs</b>                        | LILRA4,CLEC4C,PLD4,PHEX,IL3RA,PTCRA,IRF8,IRF7,GZMB,CXCR3                                                   | Rooney*** |

\* Jin, Renjie, et al. "NF- $\kappa$ B gene signature predicts prostate cancer progression." *Cancer research* 74.10 (2014): 2763-2772.]

\*\* Milacic, Marija, et al. "Annotating cancer variants and anti-cancer therapeutics in reactome." *Cancers* 4.4 (2012): 1180-1211.] APA

\*\*\* Rooney, Michael S., et al. "Molecular and genetic properties of tumors associated with local immune cytolytic activity." *Cell* 160.1 (2015): 48-61.] APA

**Table S5. Immune gene signatures.** Lists of genes used to calculate enrichment scores of immune functional sets and immune subsets.

## Supplementary Table 6: PI score and functional immune gene sets.

|             | Type I IFN<br>Reponse | TNF-<br>signaling | NF-kappaB<br>signaling | Type II IFN<br>Reponse | Cytolytic<br>Activity |
|-------------|-----------------------|-------------------|------------------------|------------------------|-----------------------|
| <b>PAAD</b> | 0.8812                | 0.5332            | 0.2713                 | -0.0135                | -0.1618               |
| <b>BLCA</b> | 0.77                  | 0.3245            | -0.0244                | -0.2167                | 0.4057                |
| <b>HNSC</b> | 0.8452                | 0.4944            | 0.1303                 | -0.2304                | 0.3692                |
| <b>LUAD</b> | 0.7419                | 0.1594            | 0.2848                 | 0.0764                 | 0.0982                |
| <b>LUSC</b> | 0.8055                | 0.27              | 0.1607                 | 0.0067                 | 0.2995                |
| <b>COAD</b> | 0.7914                | 0.173             | 0.0272                 | 0.0942                 | 0.4293                |
| <b>OV</b>   | 0.8183                | 0.3886            | 0.3239                 | 0.163                  | 0.0762                |
| <b>UCEC</b> | 0.8144                | 0.3438            | 0.2414                 | 0.067                  | 0.2766                |
| <b>BRCA</b> | 0.8367                | 0.239             | 0.136                  | -0.1352                | 0.232                 |
| <b>GBM</b>  | 0.7534                | 0.3968            | 0.137                  | 0.0384                 | 0.37                  |
| <b>ACC</b>  | 0.7081                | 0.1606            | 0.0551                 | -0.0282                | 0.3728                |
| <b>UCS</b>  | 0.7943                | 0.394             | 0.2114                 | 0.2704                 | 0.4714                |
| <b>PRAD</b> | 0.7525                | 0.188             | -0.1197                | 0.095                  | 0.3243                |
| <b>LIHC</b> | 0.6735                | 0.0268            | 0.0803                 | 0.2423                 | 0.1744                |
| <b>LGG</b>  | 0.7207                | 0.3617            | 0.1915                 | 0.1928                 | 0.5642                |
| <b>KIRP</b> | 0.3019                | -0.278            | 0.463                  | -0.0383                | 0.5388                |
| <b>KICH</b> | 0.6238                | -0.0379           | 0.1031                 | -0.2019                | 0.5221                |
| <b>KIRC</b> | 0.4827                | 0.138             | 0.3329                 | -0.0074                | 0.2194                |
| <b>CCLC</b> | <b>0.8532</b>         | <b>0.5267</b>     | <b>0.1285</b>          | <b>0.4185</b>          | <b>-0.0943</b>        |

**Table S6. PI score and functional immune gene sets.** Spearman coefficients for the correlations of cancer type's functional immune gene sets scores calculated using ssGSEA and the PI score. The gene signatures can be found in supplementary table 5. High correlations are observed with type I interferon (IFN) signaling.

## Supplementary Table 7: PI score and immune subsets estimated by Hematoxylin and Eosin

|      | Lymphocytes | Monocytes | Neutrophils |
|------|-------------|-----------|-------------|
| BLCA | 0.0448      | 0.0575    | 0.0586      |
| BRCA | 0.0553      | 0.0522    | 0.0693      |
| COAD | 0.1852      | -0.1055   | 0.1612      |
| HNSC | -0.1116     | 0.0419    | 0.0646      |
| KIRC | 0.0728      | 0.0126    | 0.0424      |
| KIRP | 0.1518      | 0.3255    | 0.0489      |
| LGG  | 0.1176      | 0.0362    | 0           |
| LIHC | 0.1075      | 0.019     | 0.044       |
| LUAD | -0.0359     | -0.0396   | -0.0823     |
| LUSC | 0.1575      | -0.0123   | 0.1071      |
| PRAD | 0.0527      | 0.0934    | 0.085       |
| UCEC | -0.0296     | 0.0133    | 0.0749      |
| PAAD | -0.069      | 0.0162    | -0.0476     |

**Table S7. PI score and immune subsets estimated by Hematoxylin and Eosin.** Spearman coefficients for the correlations of cancer types with at least 80 samples of estimation of major immune subsets based on Hematoxylin and Eosin (H&E) staining and PI scores. All correlations are lower than 0.2.



## Supplementary Table 8: PI score and immune subsets estimate by gene signatures

|             | Macrophages |        | pDCs   |         | CD4+ Regulatory T-cells |        | Neutrophils |         | NK cells |         | B-cells |         | CD8+ T-cells |         |
|-------------|-------------|--------|--------|---------|-------------------------|--------|-------------|---------|----------|---------|---------|---------|--------------|---------|
|             | TCGA        | CCLC   | TCGA   | CCLC    | TCGA                    | CCLC   | TCGA        | CCLC    | TCGA     | CCLC    | TCGA    | CCLC    | TCGA         | CCLC    |
| <b>BLCA</b> | 0.4436      | 0.5354 | 0.3196 | 0.3126  | 0.3673                  | 0.0617 | 0.0897      | 0.1007  | 0.2883   | -0.1508 | -0.0145 | 0.0824  | 0.2298       | 0.0177  |
| <b>BRCA</b> | 0.3596      | 0.4915 | 0.2729 | -0.0844 | 0.2709                  | 0.3745 | 0.1434      | 0.3831  | 0.0944   | -0.2573 | -0.0091 | -0.2912 | 0.1204       | -0.2379 |
| <b>COAD</b> | 0.42        | 0.353  | 0.3233 | 0.2733  | 0.2657                  | 0.2198 | 0.2888      | 0.3845  | 0.2724   | -0.0049 | -0.0023 | 0.1418  | 0.3726       | -0.0682 |
| <b>HNSC</b> | 0.1254      | 0.4364 | 0.1094 | 0.5635  | 0.0192                  | 0.5044 | 0.0159      | 0.0605  | 0.0345   | -0.1589 | -0.3316 | 0.182   | 0.1461       | -0.2071 |
| <b>KIRC</b> | 0.3114      | 0.2666 | 0.2932 | -0.1426 | 0.2207                  | 0.2675 | 0.0945      | -0.0203 | 0.1266   | 0.1966  | 0.1214  | 0.123   | 0.2055       | 0.0746  |
| <b>LIHC</b> | 0.4842      | 0.6123 | 0.4289 | -0.0085 | 0.4755                  | 0.1877 | 0.2534      | 0.4215  | 0.202    | 0.0421  | 0.3006  | 0.2191  | 0.3229       | -0.1631 |
| <b>LUAD</b> | 0.4206      | 0.433  | 0.3241 | 0.3701  | 0.1154                  | 0.6387 | 0.1994      | 0.4497  | 0.118    | 0.1865  | -0.0481 | 0.3899  | 0.1062       | -0.1776 |
| <b>LUSC</b> | 0.4258      | 0.1237 | 0.2646 | 0.0515  | 0.3362                  | 0.1401 | 0.1869      | 0.0416  | 0.1447   | 0.0684  | 0.0279  | -0.1314 | 0.2109       | -0.3924 |
| <b>OV</b>   | 0.1792      | 0.3157 | 0.1536 | 0.4584  | 0.0124                  | 0.2203 | 0.0978      | 0.2608  | 0.0626   | 0.0188  | -0.2056 | -0.1211 | -0.1039      | -0.4392 |
| <b>PAAD</b> | 0.4491      | 0.422  | 0.0057 | -0.0815 | 0.0443                  | 0.4042 | -0.1088     | 0.3541  | -0.2099  | -0.1665 | -0.2331 | 0.4132  | -0.2405      | -0.0822 |
| <b>UCEC</b> | 0.3624      | 0.4829 | 0.2683 | 0.3578  | 0.1522                  | 0.7179 | 0.175       | -0.3724 | -0.0358  | -0.2228 | -0.0581 | 0.0031  | 0.0442       | -0.1233 |

**Table S8. PI score and immune subsets estimate by gene signatures.** Spearman coefficients for the correlations of cancer type's immune subsets scores calculated using ssGSEA and the PI score for both TCGA and CCLC samples. The gene signatures can be found in supplementary table 5. Only cancer types with at least 20 samples in CCLC are presented. We observed same trends in both TCGA and CCLC across cancer types, suggesting that the correlations are not a result of immune infiltrations, rather activation of shared pathways of PI with macrophages, pDCs and regulatory T-cells.

## Supplementary Table 9: Survival and parainflammation

| Cancer type | N    | Cox p-value | Beta    | % PI+ | % died | Log-rank p-value | Median survival PI+ (days) | Median survival PI- (days) | Age controlled p-value | Age + smoking controlled p-value |
|-------------|------|-------------|---------|-------|--------|------------------|----------------------------|----------------------------|------------------------|----------------------------------|
| PAAD        | 177  | 6.7E-05     | 8.3195  | 77.97 | 33.33  | 3.2E-04          | 591                        | 2110                       | 2.3E-04                | 5.4E-04                          |
| KIRC        | 533  | 5.9E-04     | 7.3887  | 0     | 30.02  | N/A              | N/A                        | N/A                        | 1.5E-03                | 8.7E-02                          |
| LGG         | 515  | 8.4E-04     | 4.6645  | 3.69  | 17.86  | 8.5E-04          | 756                        | 2649                       | 2.8E-02                | N/A                              |
| HNSC        | 511  | 1.4E-03     | 3.5242  | 63.6  | 32.29  | 4.1E-03          | 1131                       | 1748                       | 1.8E-03                | 8.3E-04                          |
| LUAD        | 492  | 9.4E-03     | 3.469   | 49.19 | 24.59  | 9.8E-03          | 1147                       | 1503                       | 7.6E-03                | 8.0E-03                          |
| UCEC        | 174  | 5.9E-02     | 7.2108  | 16.09 | 7.47   | 6.8E-01          | N/A                        | 2959                       | 3.7E-02                | N/A                              |
| GBM         | 159  | 2.5E-01     | 1.3922  | 11.32 | 66.67  | 9.1E-01          | 418                        | 397                        | 5.0E-01                | N/A                              |
| PRAD        | 496  | 2.7E-01     | -5.6807 | 6.05  | 1.61   | 9.3E-01          | N/A                        | N/A                        | 2.7E-01                | N/A                              |
| LUSC        | 491  | 3.2E-01     | 1.1492  | 39.71 | 31.57  | 6.3E-01          | 1324                       | 1636                       | 2.6E-01                | 2.8E-01                          |
| UCS         | 57   | 3.7E-01     | 1.8476  | 8.77  | 56.14  | 7.3E-01          | N/A                        | 708                        | 4.3E-01                | N/A                              |
| BLCA        | 406  | 3.8E-01     | -1.1843 | 74.63 | 26.11  | 7.9E-01          | 1842                       | 1042                       | 6.9E-01                | 7.0E-01                          |
| KIRP        | 287  | 4.1E-01     | 2.7741  | 2.09  | 11.15  | 8.2E-01          | N/A                        | N/A                        | 4.5E-01                | 1.6E-01                          |
| ACC         | 79   | 6.1E-01     | 1.5126  | 8.86  | 31.65  | 2.4E-03          | 552                        | N/A                        | 6.6E-01                | N/A                              |
| BRCA        | 1084 | 6.2E-01     | -0.7571 | 15.5  | 9.32   | 3.5E-01          | 3446                       | 3916                       | 7.7E-01                | N/A                              |
| LIHC        | 370  | 6.6E-01     | 0.763   | 4.86  | 24.05  | 9.9E-01          | 1746                       | 1694                       | 5.6E-01                | N/A                              |
| OV          | 259  | 7.0E-01     | -0.4589 | 22.39 | 56.37  | 2.3E-01          | 1419                       | 1252                       | 9.6E-01                | N/A                              |
| KICH        | 65   | 7.8E-01     | -1.3429 | 1.54  | 12.31  | 8.0E-01          | 1140                       | N/A                        | 8.1E-01                | 5.4E-01                          |
| COAD        | 282  | 9.3E-01     | 0.1933  | 38.3  | 14.54  | 9.5E-01          | 2856                       | 2361                       | 9.4E-01                | 1.0E+00                          |

**Table S9. Survival and parainflammation.** Survival analysis performed for each cancer type. The table presents the number of samples with both PI score and survival data, Cox regression p-value of the survival predicted by PI score and the beta of the regression. A positive beta means that there is higher mortality is associated with higher PI score. In 11 of the cancer types beta>1 and only in 3 beta<-1. Additionally, we performed a log-rank analysis of PI+ vs. PI-, and median survival is presented as well. Finally, we performed Cox regression analysis controlling the PI score to age at diagnosis and age + a smoking indicator (current smoker, stopped smoking <15 years ago, stopped smoking >15 years ago, non-smoker). The significance of PI score in predicting survival in PAAD, LGG, HNSC and LUAD is maintained in all analyses.

## Supplementary Table 10: Clinical features and parainflammation

|      | Age     | Gender  | Race    | Weight  | Height  | Pathologic T | Pathologic N | Pathologic M | Pathologic stage | Smoking history |
|------|---------|---------|---------|---------|---------|--------------|--------------|--------------|------------------|-----------------|
| ACC  | 9.5E-02 | 7.0E-01 | N/A     | N/A     | N/A     | 4.9E-01      | 6.1E-01      | N/A          | 2.2E-01          | N/A             |
| BLCA | 7.9E-01 | 8.4E-01 | 9.4E-01 | 9.8E-01 | 3.9E-01 | 5.6E-01      | 5.4E-01      | 4.6E-01      | 2.9E-01          | 5.8E-01         |
| BRCA | 8.3E-01 | 2.4E-01 | 5.6E-03 | N/A     | N/A     | 6.2E-01      | 8.1E-02      | 6.6E-01      | 8.2E-01          | N/A             |
| COAD | 8.9E-02 | 3.8E-01 | 3.6E-02 | 4.1E-01 | 9.0E-01 | 8.5E-01      | 3.8E-01      | 2.5E-01      | 4.3E-01          | N/A             |
| GBM  | 5.4E-01 | 5.8E-01 | 7.3E-01 | N/A     | N/A     | N/A          | N/A          | N/A          | N/A              | N/A             |
| HNSC | 7.7E-01 | 3.0E-03 | 6.4E-02 | N/A     | N/A     | 3.8E-04      | 2.2E-01      | 6.8E-01      | 9.5E-01          | 1.2E-01         |
| KICH | 1.8E-01 | 1.4E-01 | N/A     | N/A     | N/A     | 3.5E-01      | 4.5E-01      | 6.2E-01      | 1.2E-01          | N/A             |
| KIRC | 1.4E-01 | 9.4E-01 | 5.1E-03 | N/A     | N/A     | 2.5E-03      | 1.1E-01      | 1.3E-03      | 1.1E-05          | 9.6E-01         |
| KIRP | 9.3E-02 | 9.6E-01 | 5.0E-02 | 4.3E-02 | 4.4E-01 | 1.1E-01      | 1.1E-01      | 7.3E-01      | 2.6E-01          | 8.7E-01         |
| LGG  | 4.4E-07 | 3.2E-01 | 6.2E-01 | N/A     | N/A     | N/A          | N/A          | N/A          | N/A              | N/A             |
| LIHC | 4.7E-01 | 6.6E-06 | 3.6E-01 | 7.4E-02 | 4.3E-03 | 4.8E-02      | 1.2E-01      | 9.2E-02      | 1.8E-01          | N/A             |
| LUAD | 6.2E-01 | 2.8E-03 | 2.3E-02 | N/A     | N/A     | 6.3E-02      | 5.3E-03      | 1.7E-01      | 3.1E-02          | 1.0E-01         |
| LUSC | 3.4E-01 | 4.9E-01 | 2.3E-01 | N/A     | N/A     | 5.1E-01      | 7.9E-01      | 4.2E-01      | 6.0E-01          | 1.2E-01         |
| OV   | 1.6E-03 | N/A     | 3.9E-01 | N/A     | N/A     | N/A          | N/A          | N/A          | N/A              | N/A             |
| PAAD | 5.2E-02 | 6.0E-01 | 1.2E-01 | N/A     | N/A     | 9.9E-04      | 1.6E-02      | 3.1E-01      | 3.2E-05          | 3.3E-01         |
| PRAD | 5.6E-01 | N/A     | 7.1E-02 | N/A     | N/A     | 5.3E-01      | 3.1E-03      | N/A          | N/A              | N/A             |
| UCEC | 8.5E-01 | N/A     | 5.7E-01 | 2.7E-01 | 8.5E-01 | N/A          | N/A          | N/A          | N/A              | N/A             |
| UCS  | 6.7E-1  | N/A     | 7.1E-1  | 5.9E-01 | 8.8E-01 | N/A          | N/A          | N/A          | N/A              | N/A             |

**Table S10. Clinical features and parainflammation.** P-values of the associations between the PI scores and different clinical features. P-value of binary or categorical clinical feature were calculated using one-way analysis of variance (ANOVA); continuous clinical features were calculated with Spearman correlation. Significant associations (p-value < 0.01) are marked in red).

**Supplementary Table 11: Primers used for qPCR analyses.**

| Human   |                          |                          |
|---------|--------------------------|--------------------------|
| Gene    | Forward primer           | Reverse primer           |
| AIM2    | GGCTTTGGTTTTGTTACCGA     | GCAGTGATGAAGACCATTCCG    |
| BLNK    | AGAGATGTACGTGATGCCCCG    | CCTCTGGCTTGATCGATTGTCTAT |
| BST2    | GGAAGCTGGCACATCTTGGA     | CTAACCGTGTTGCCCATGA      |
| CXCL9   | AGTGCAAGGAACCCAGTAG      | AGGGCTTGGGGCAAATTGTT     |
| CXCL10  | AGCAGAGGAACCTCCAGTCT     | AGGTACTIONCTTGAATGCCACT  |
| IFI44   | TGGGAGCTGGACCCTGTAAA     | CCTCCCTTAGATTCCCTATTTGCT |
| IFITM3  | CCGTGAAGTCTAGGGACAGG     | CCTGGAAGATCAGCACTGGG     |
| MMP7    | GTCTCTGGACGGCAGCTATG     | GATAGTCCTGAGCCTGTTCCC    |
| MX1     | ACCATTCCAAGGAGGTGCAG     | TGCGATGTCCACTTCGGAAA     |
| MX2     | TGACCTCATCGACTCCCTGC     | GTTACGATTCCGCTGCCTCT     |
| OAS2    | GCTCAGAAGCTGGGTTGGTT     | GAGCCACCTATGGCCACTC      |
| OAS3    | CCAGCAGTGTACCAAGATCTCC   | CTGCTCCCAGGCATACACAG     |
| UBC     | ATTTGGGTCGCGTTCTTG       | TGCCTTGACATTCTCGATGGT    |
| Mouse   |                          |                          |
| Gene    | Forward primer           | Reverse primer           |
| CXCL10  | GAAGCTTGAAATCATCCCTGC    | ACGCTTTCATTAAATTCTTGATGG |
| IFIT1   | CCCAGAGAACAGCTACCACCTT   | TGCTCTGAGATTCTCACTTCCAA  |
| IFIT2   | AGCAGACAGTTACACAGCAGTCAT | TCCTCAAACCTCATCCAAGGACT  |
| IFIT3   | TTCTGAACTGCTCAGCCCA      | TGACTGGACATACTTCCCTCCCT  |
| IFITM3  | CTGCTGCCTGGGCTTCATAG     | GGATGCTGAGGACCAAGGTG     |
| OAS2    | TGGAAAGTGCCAGTAATGCAG    | TCCAGAAGCGTCTTCCAGAG     |
| PLA2G2A | AAGGCCTTGAACAAGAAACCA    | GCCATGATCGAGGCTGCTA      |
| UBC     | CAGCCGTATATCTTCCAGACT    | CTCAGAGGGATGCCAGTAATCTA  |
